# Supplementary material for: ChIPr: accurate prediction of cohesin-mediated 3D genome organization from 2D chromatin features
Source: PubMed Central journal article supplement (PMC10785520; doi:10.1186/s13059-023-03158-7), 2024-01-12

Fig. S1

A

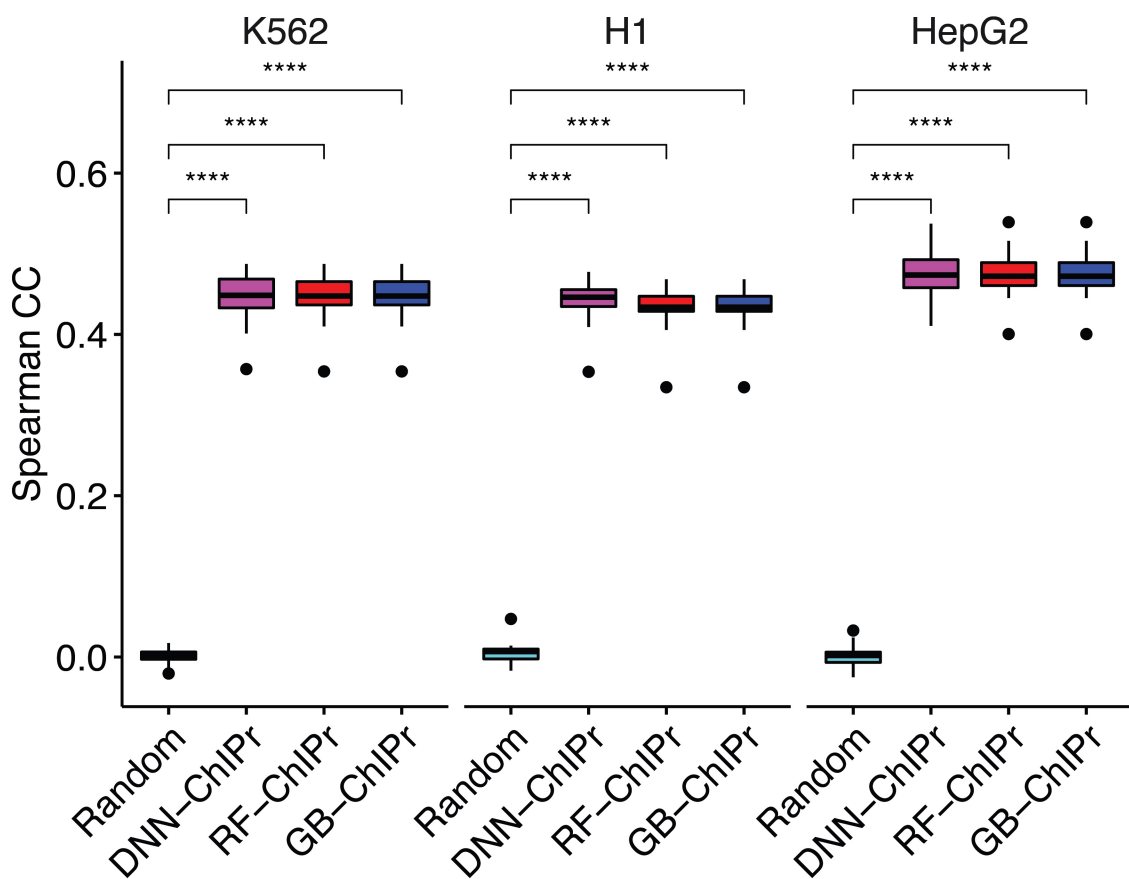

B

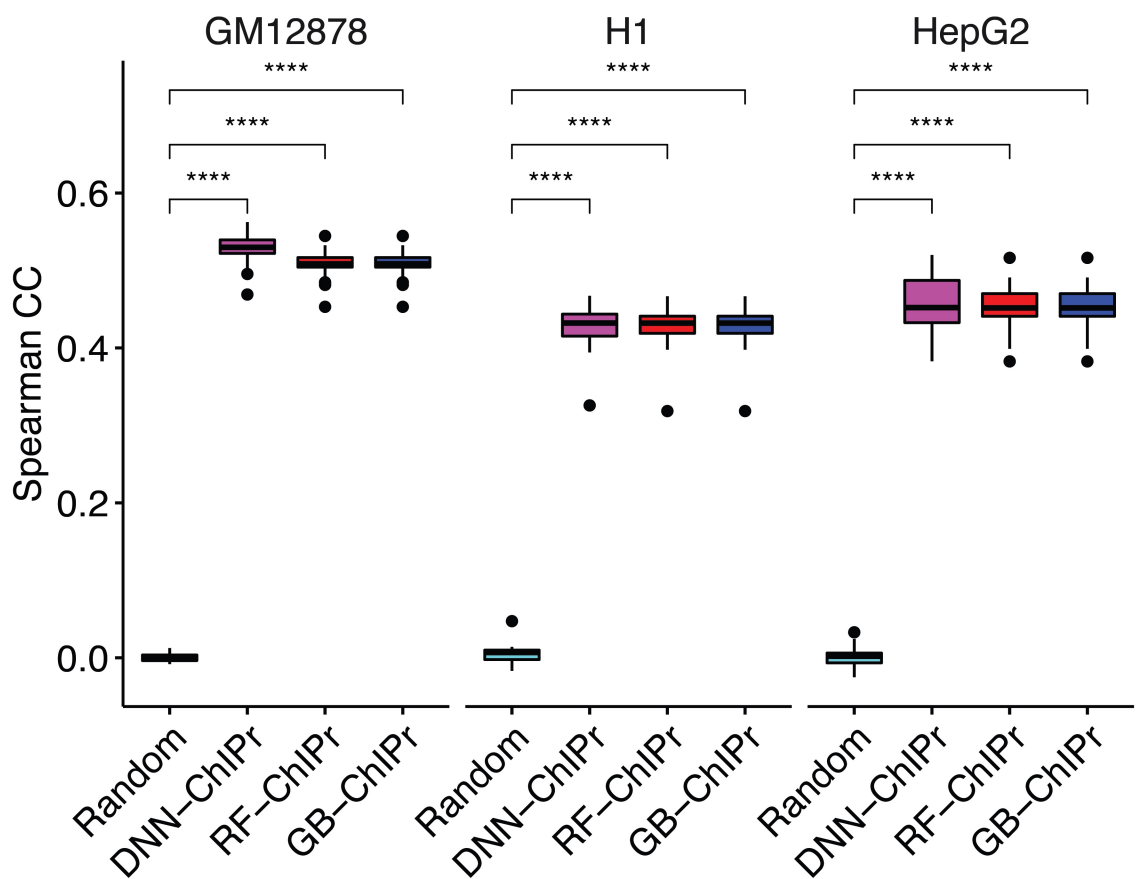

Fig. S2

**A**

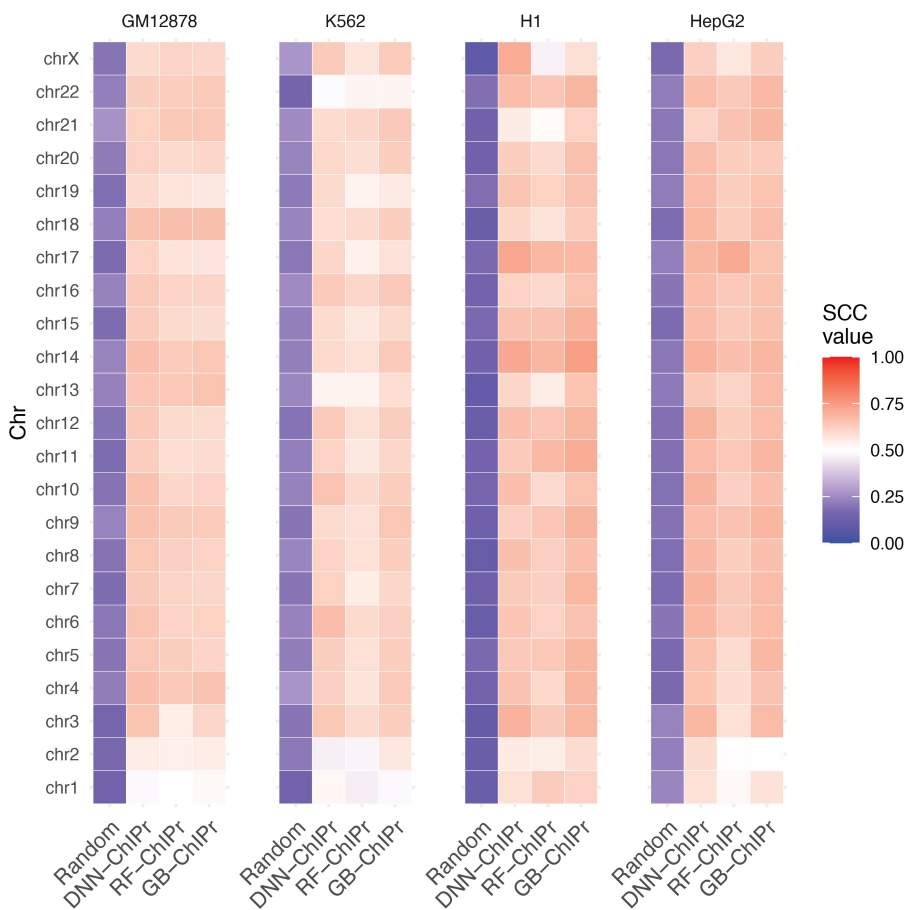

**B**

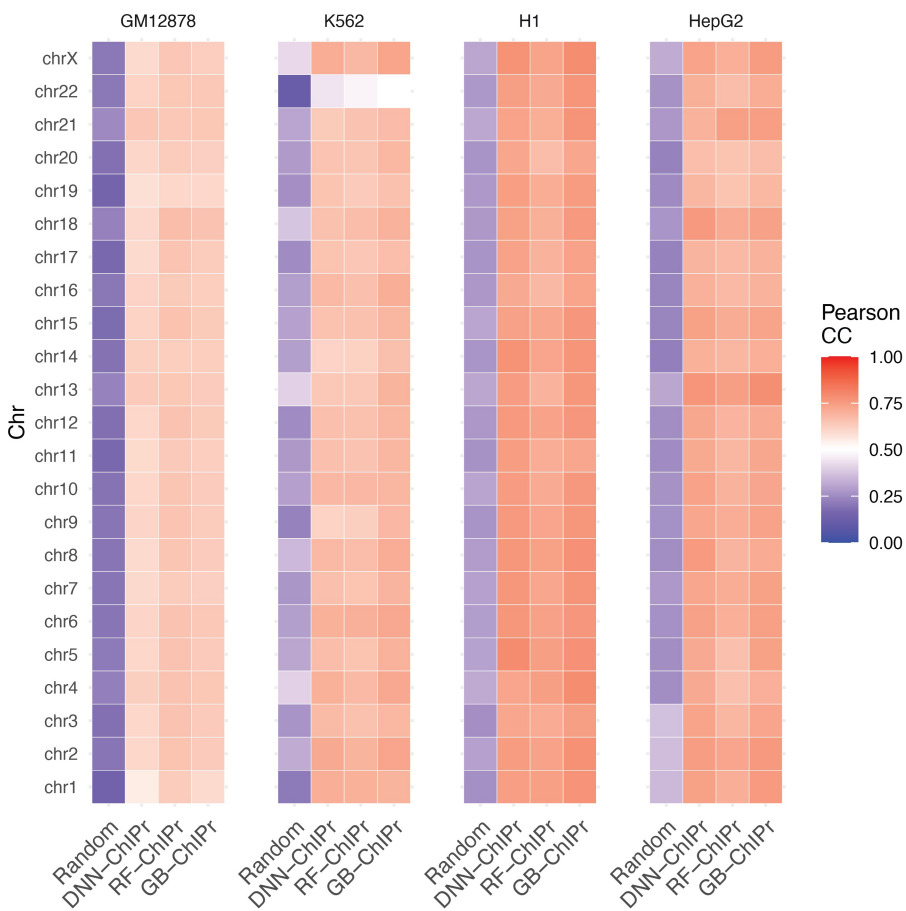

**Fig. S3**

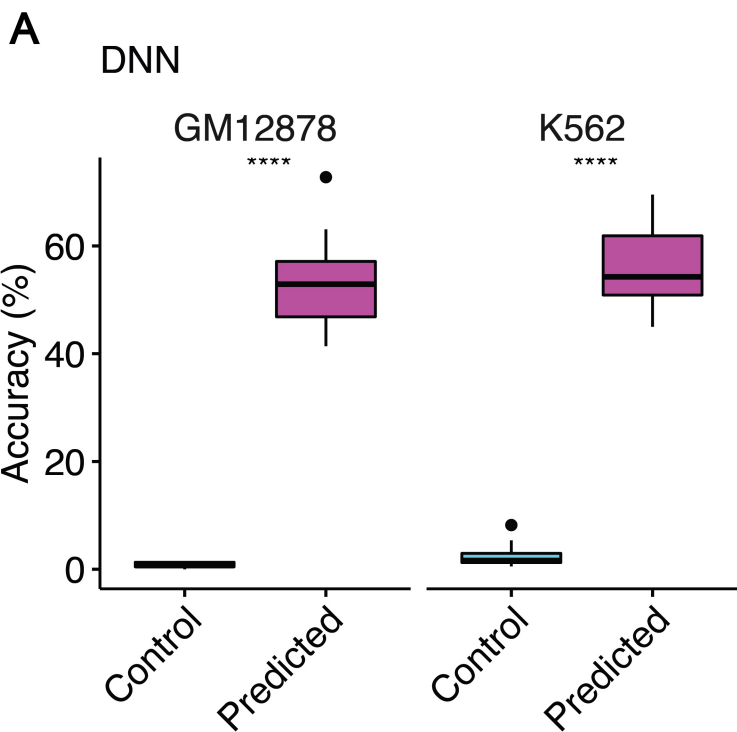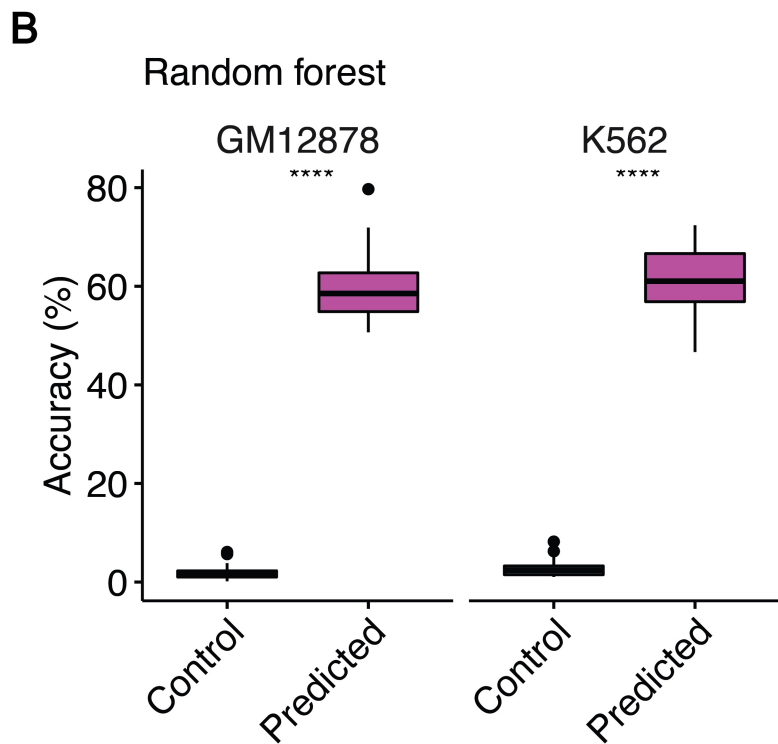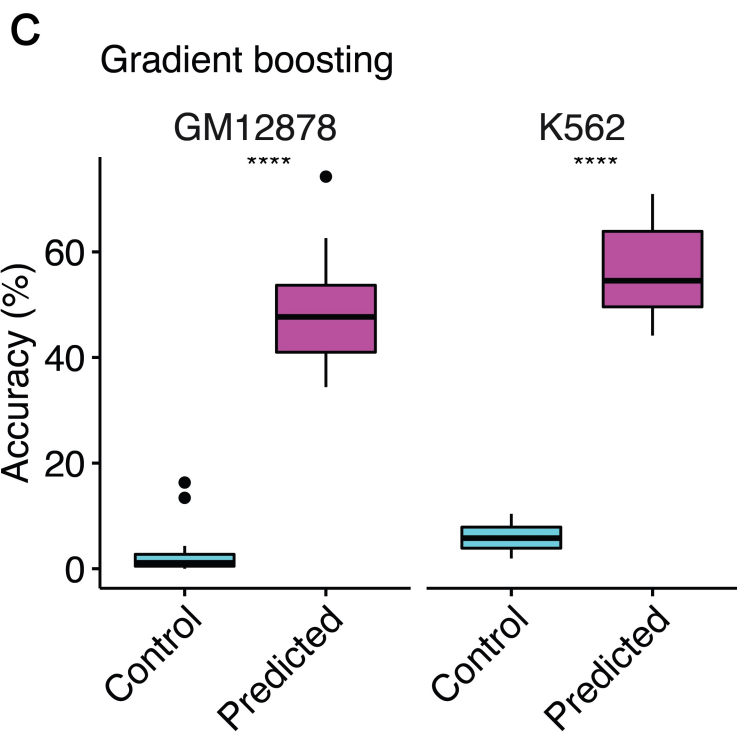

**Fig. S4**

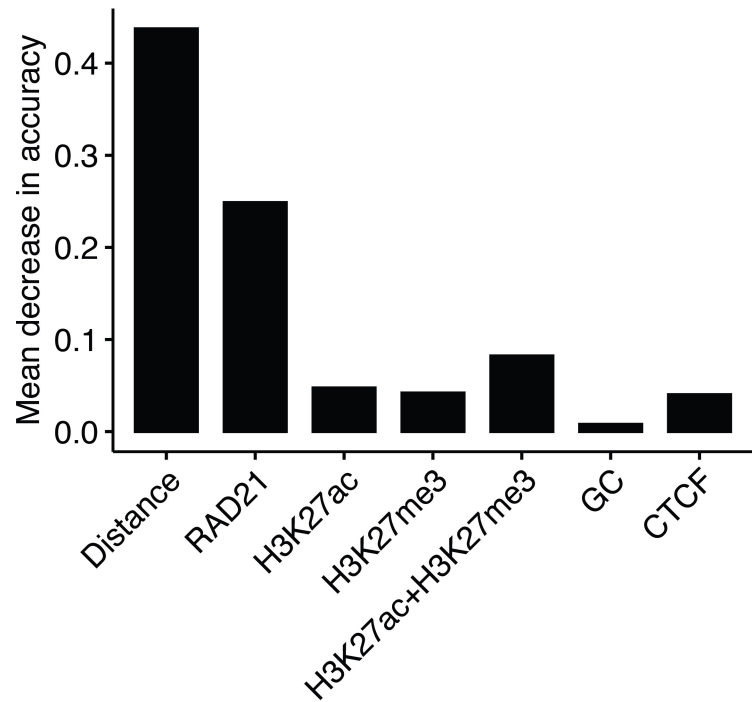

**Fig. S5****A**

DNN-ChIPr trained on GM12878 data

Full\_model Minimal\_model

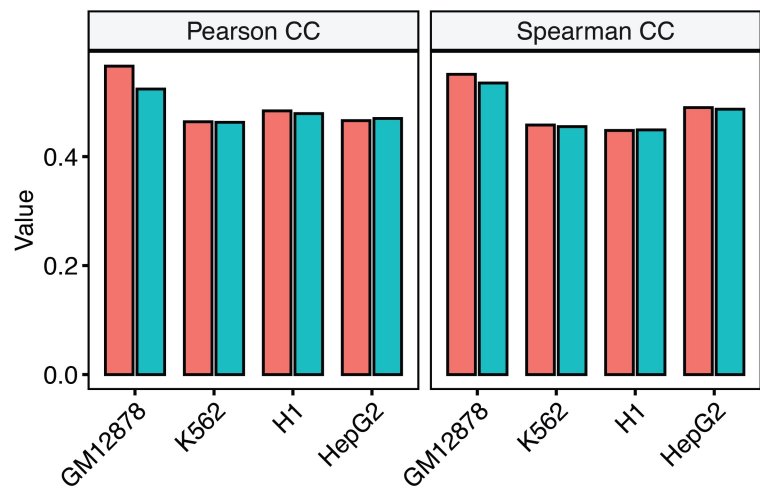**B**

DNN-ChIPr trained on K562 data

Full\_model Minimal\_model

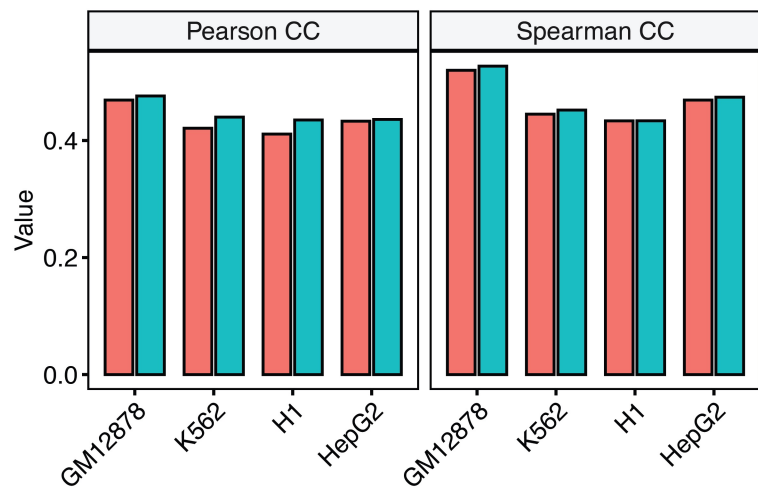**C**

GB-ChIPr trained on GM12878 data

Full\_model Minimal\_model

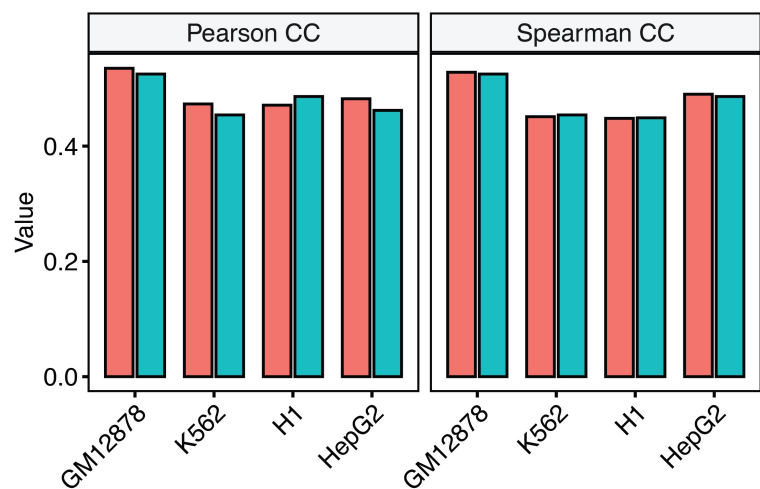**D**

GB-ChIPr trained on K562 data

Full\_model Minimal\_model

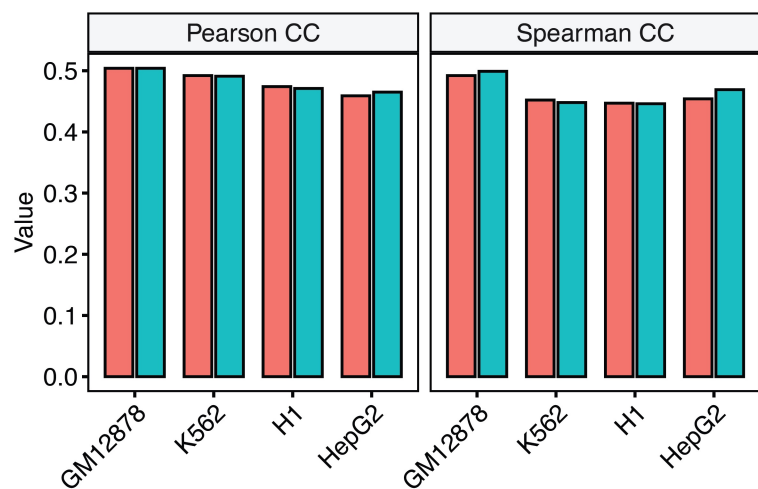

**Fig. S6**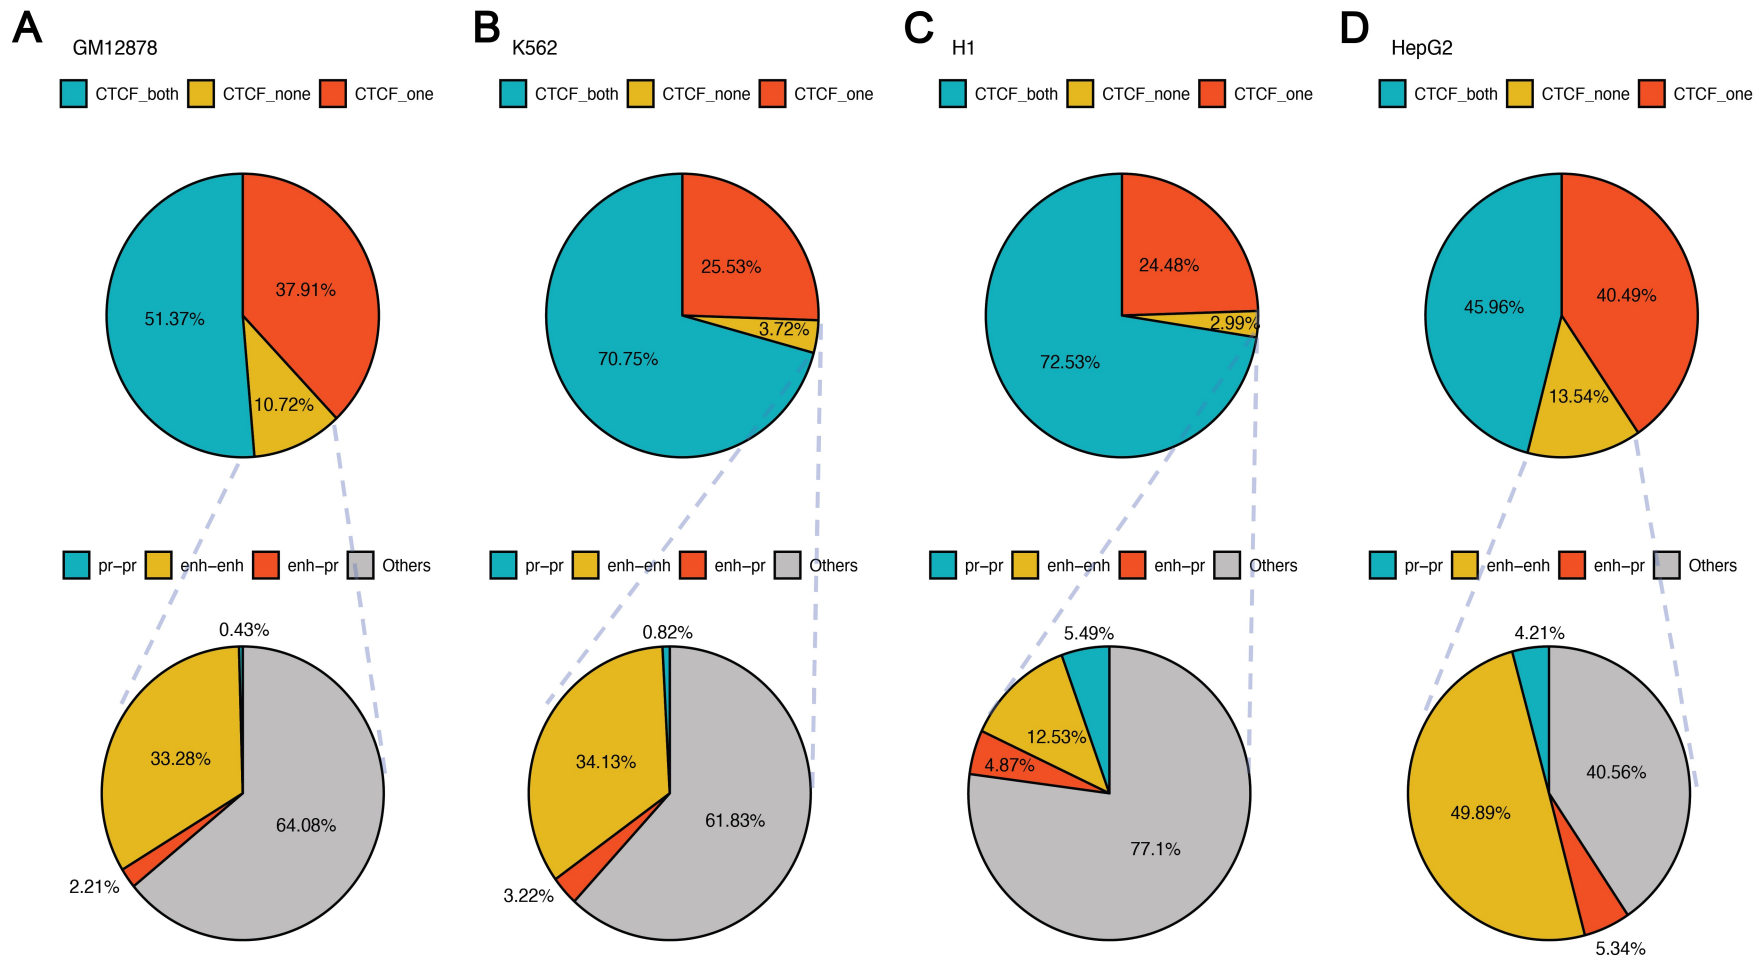

**Fig. S7**

H1 cell line

**A**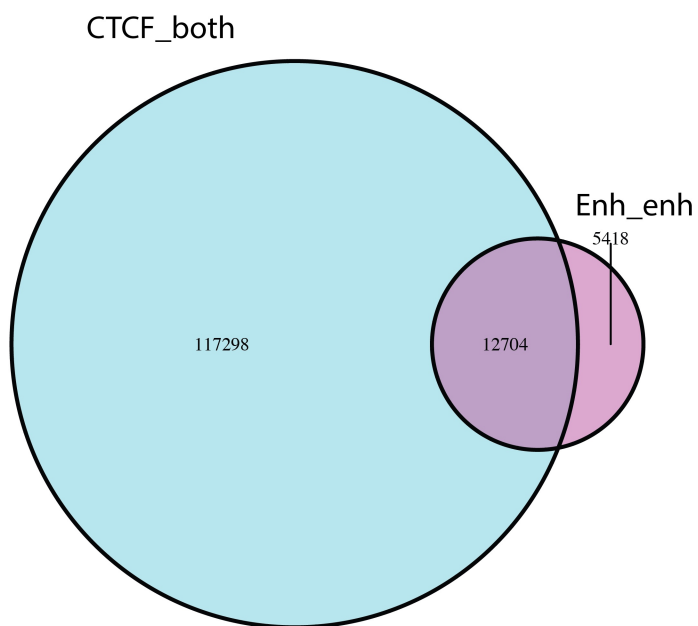**B**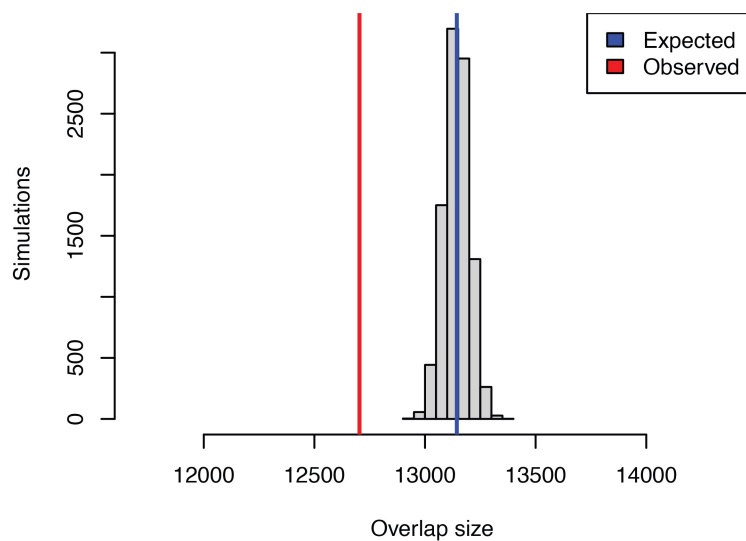**C**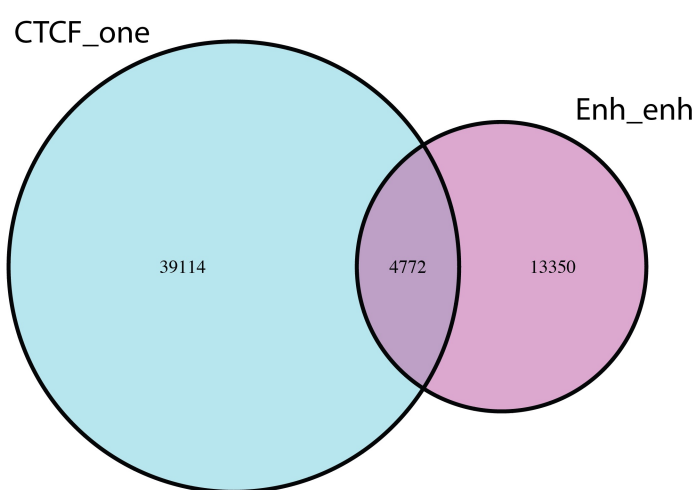**D**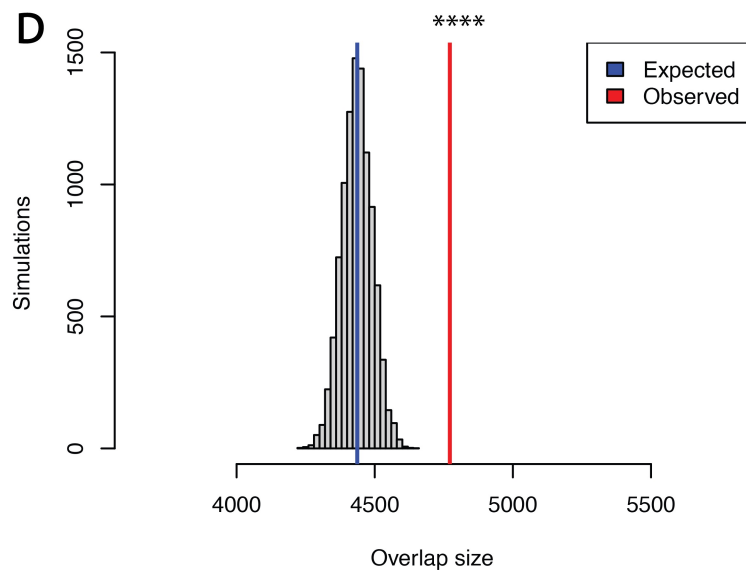**E**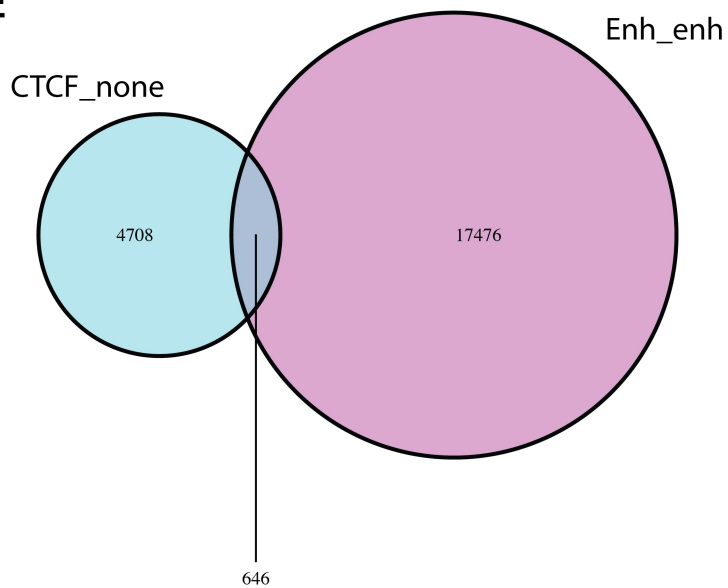**F**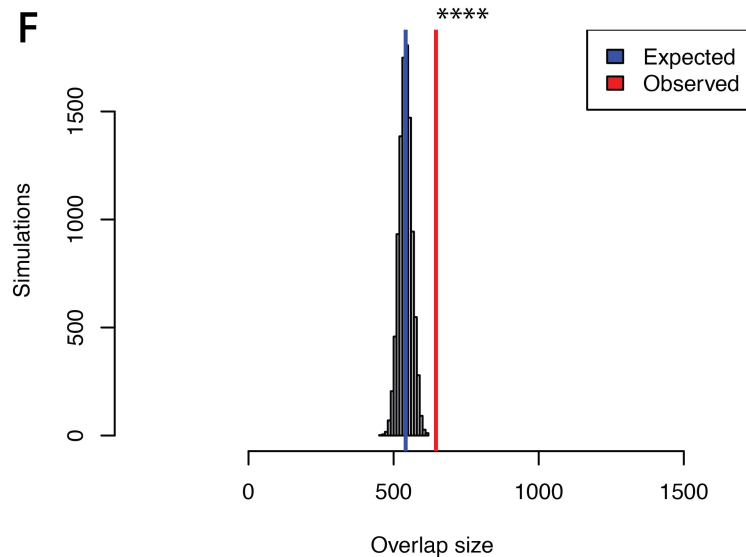

**Fig. S8****HepG2 cell line**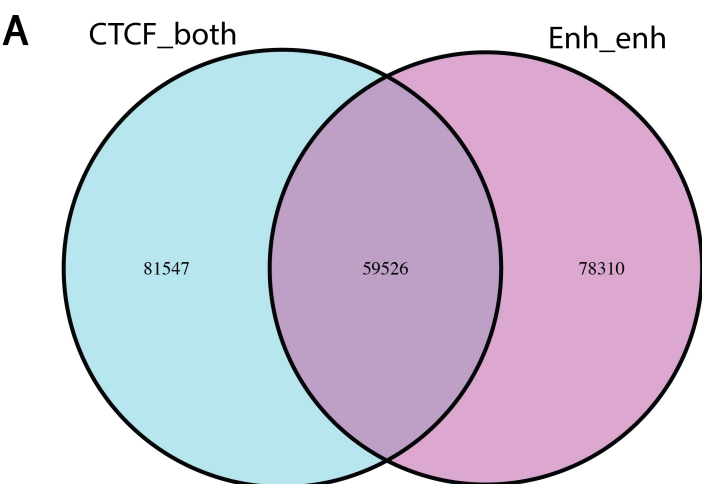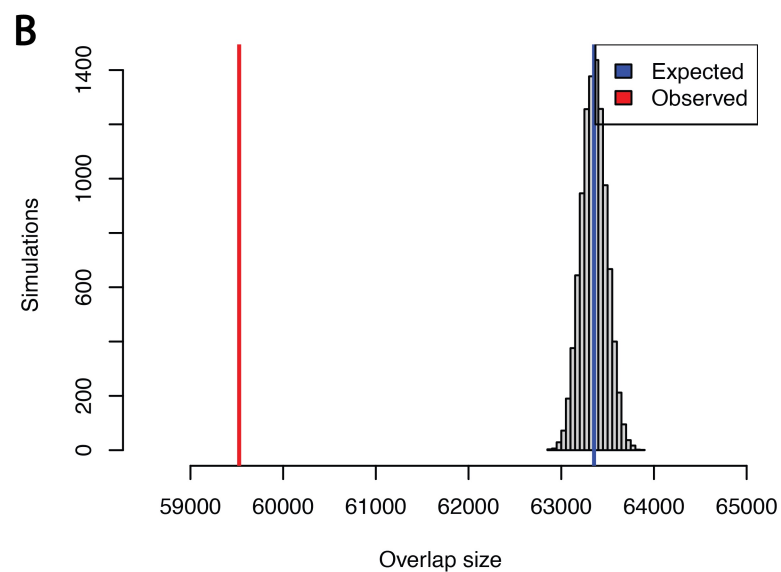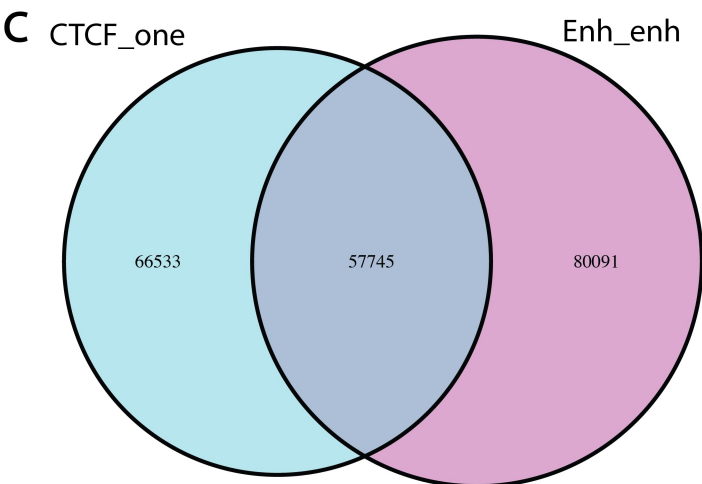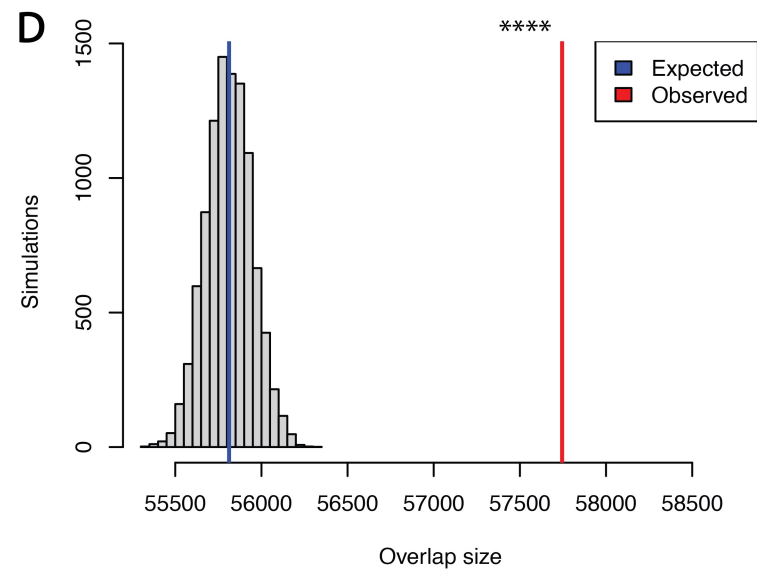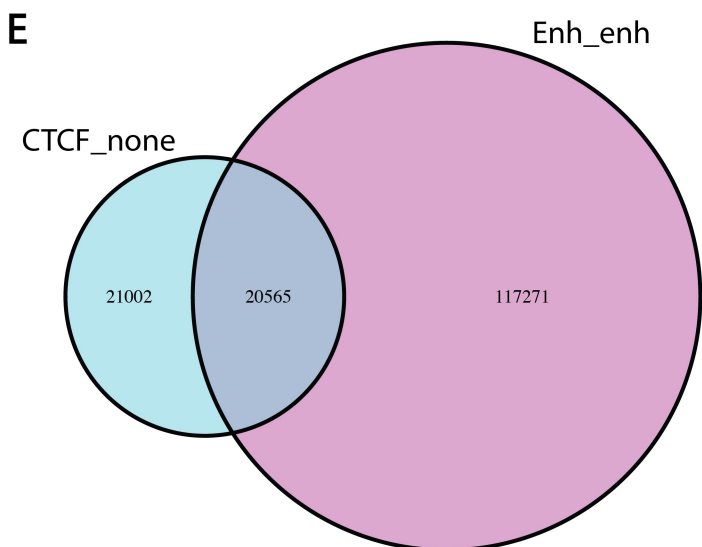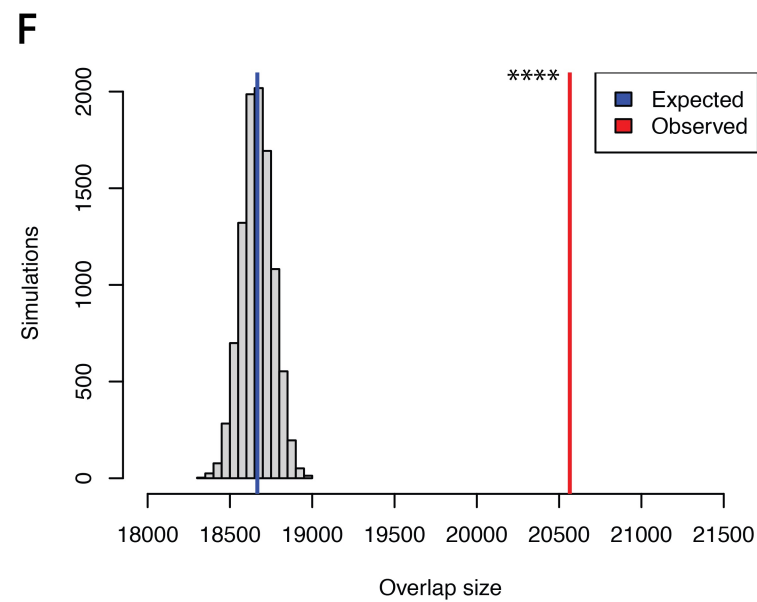



Fig. S9

**A**

H9

CTCF\_both CTCF\_none CTCF\_one

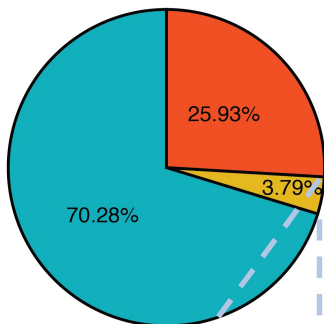

pr-pr enh-enh enh-pr Others

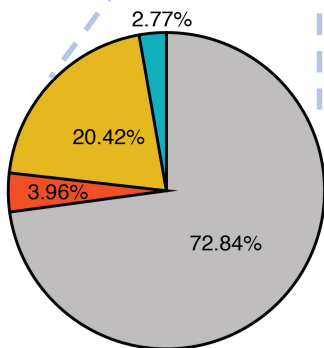

**B**

MCF7

CTCF\_both CTCF\_none CTCF\_one

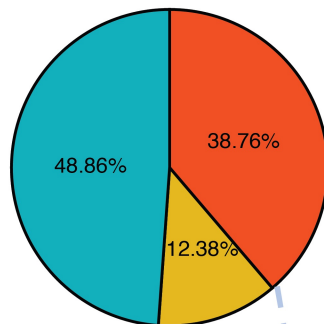

pr-pr enh-enh enh-pr Others

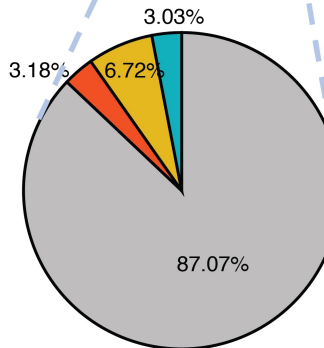

**C**

LNCaP

CTCF\_both CTCF\_none CTCF\_one

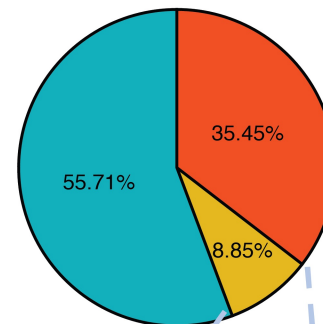

pr-pr enh-enh enh-pr Others

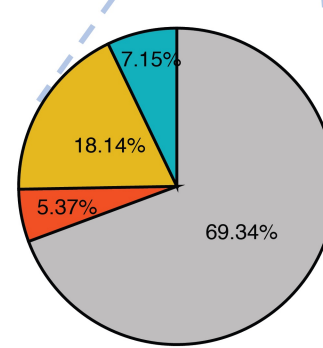

**Fig. S10**  
H9 cell line

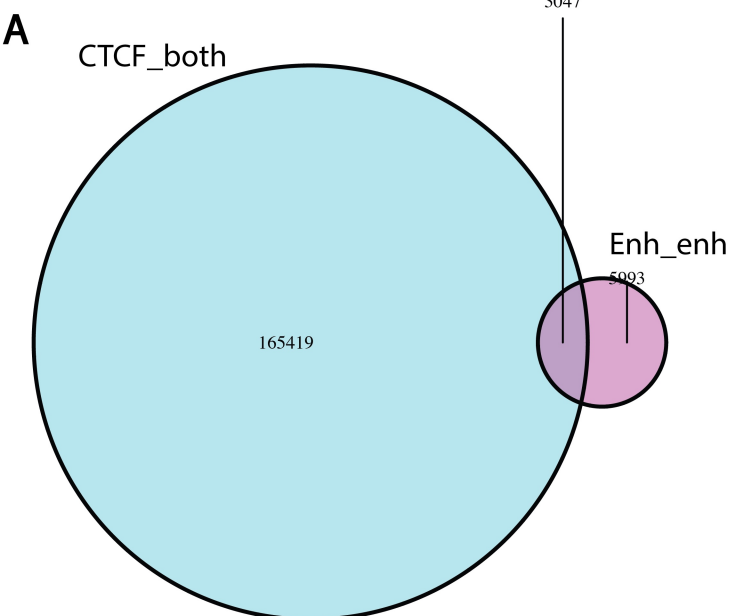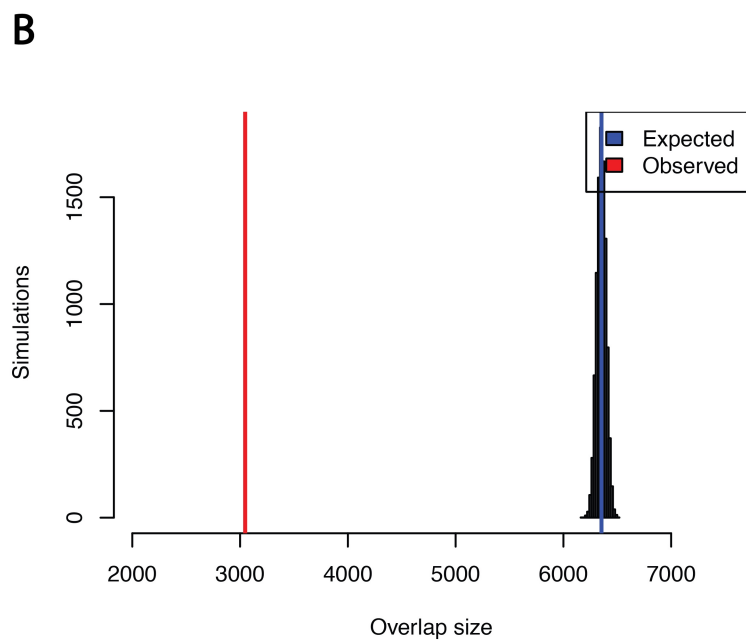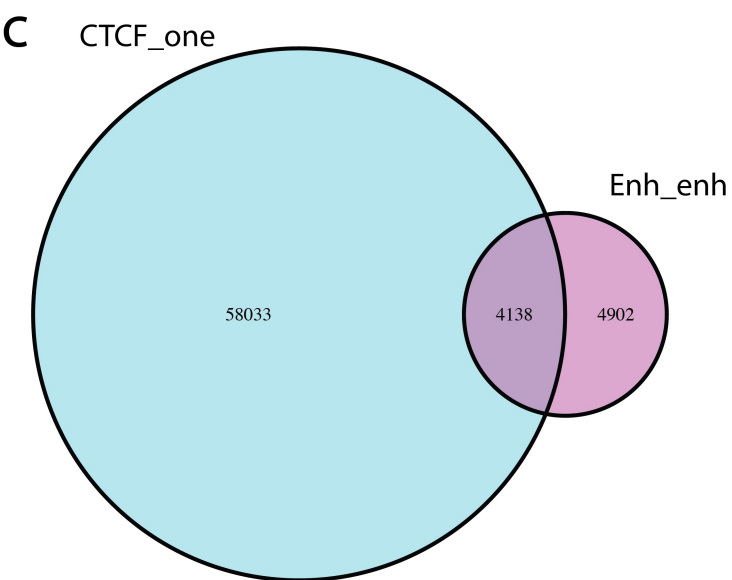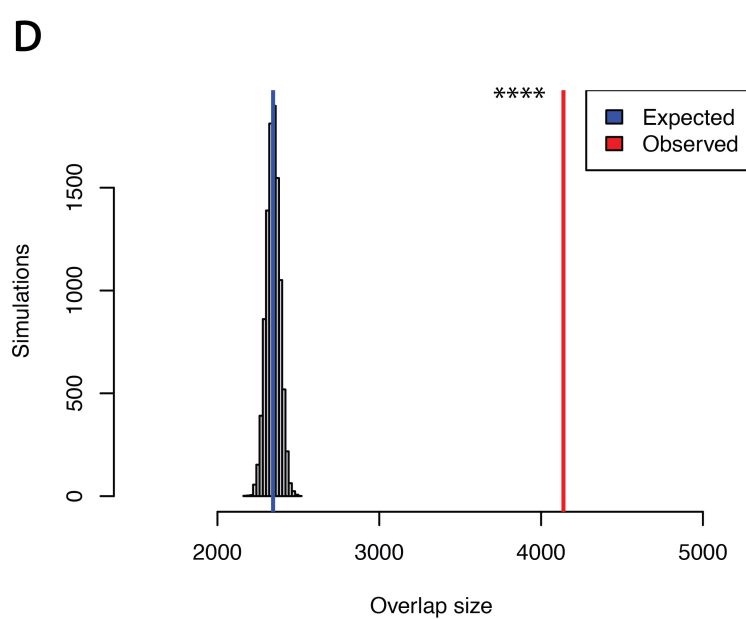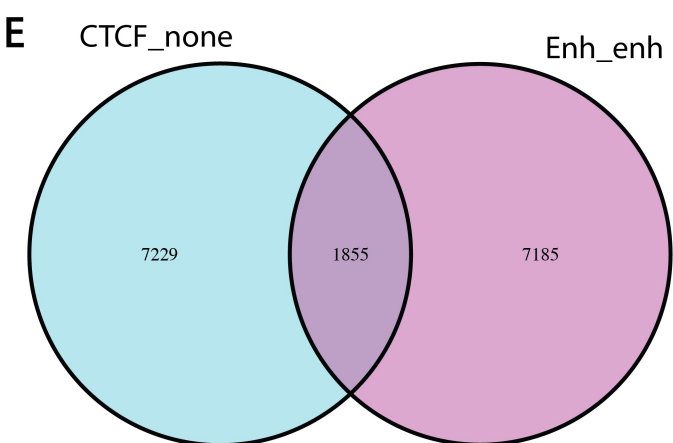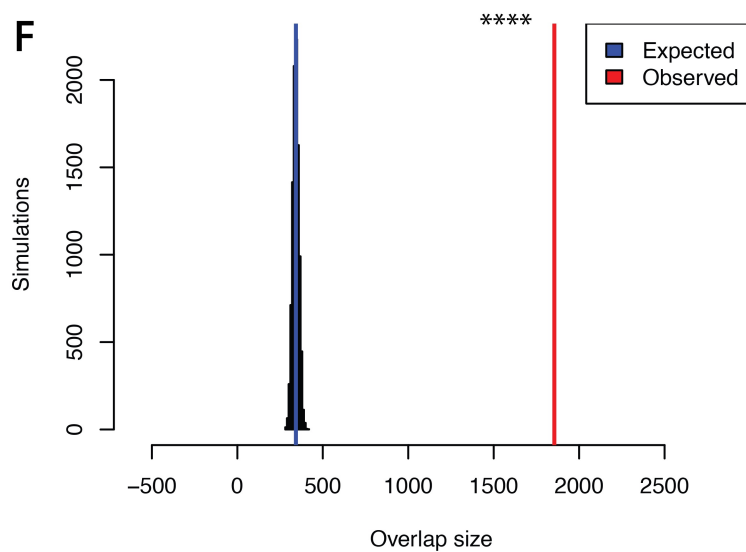

**Fig. S11**  
MCF7 cell line

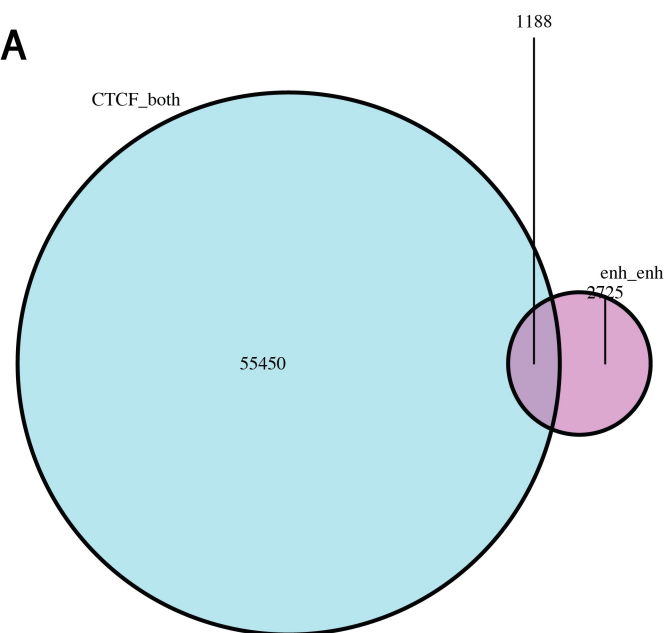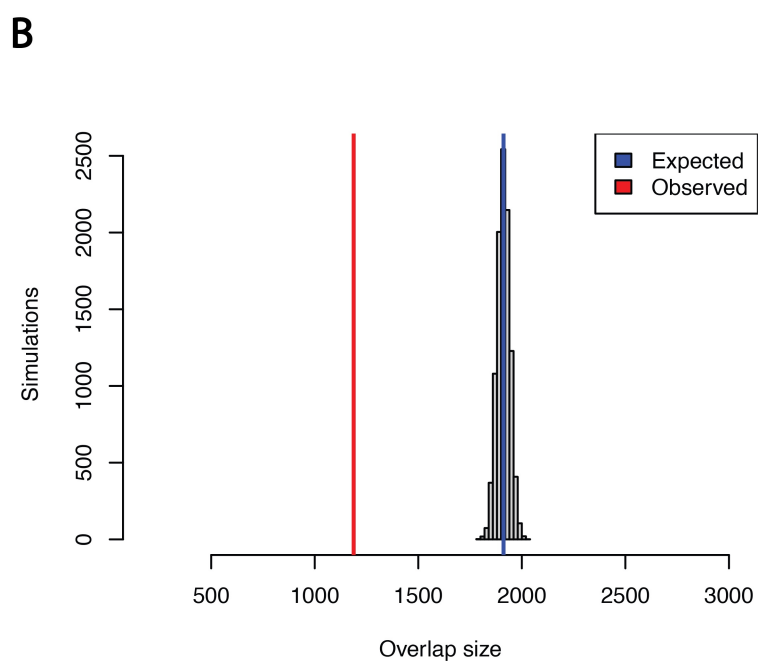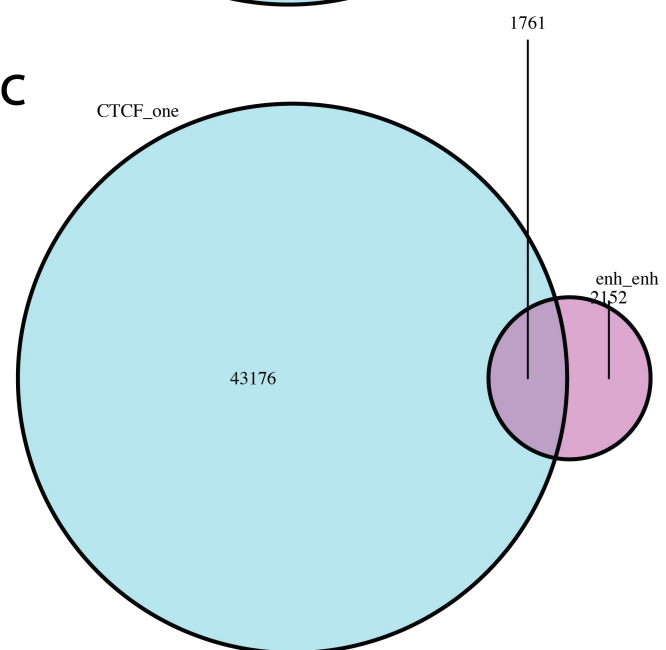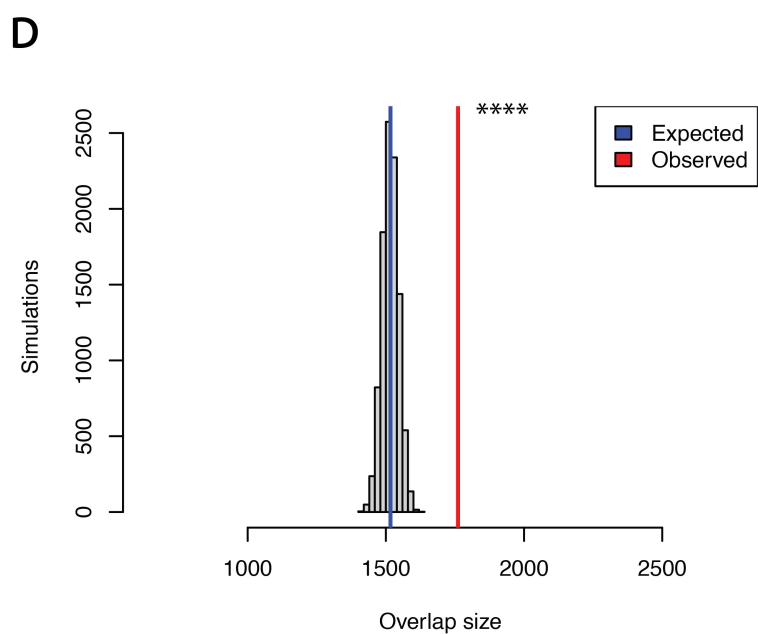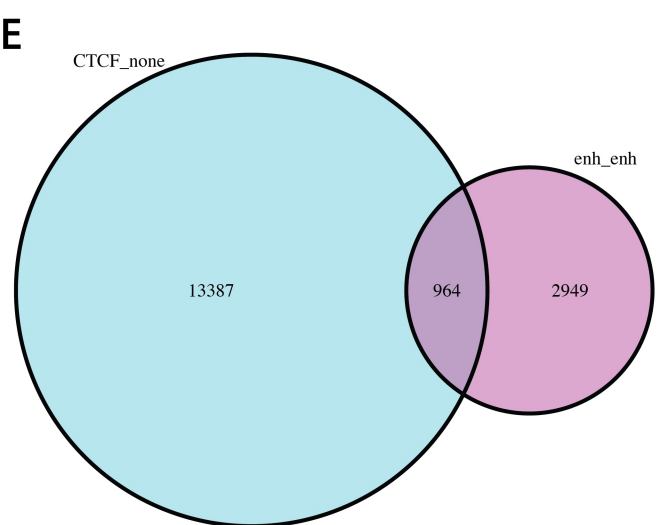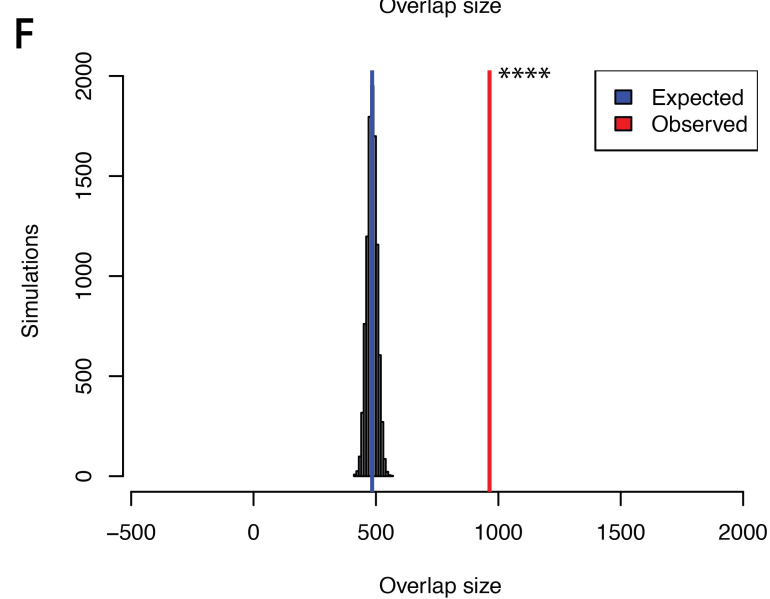

**Fig. S12**

LNCaP cell line

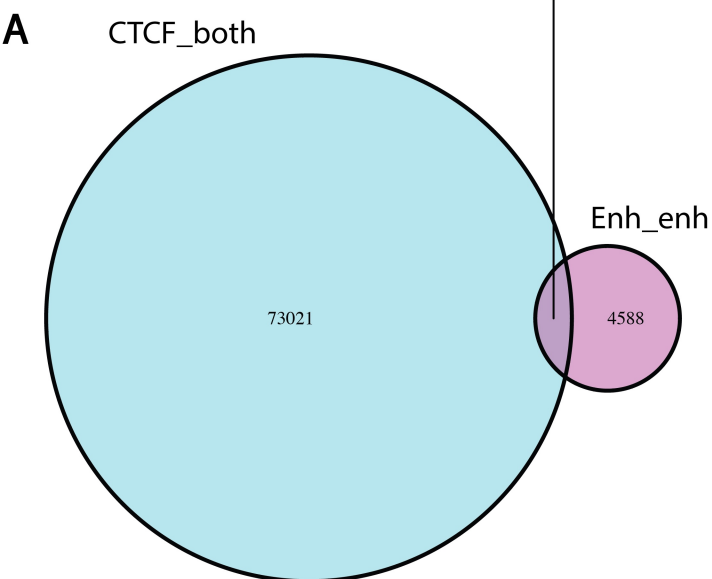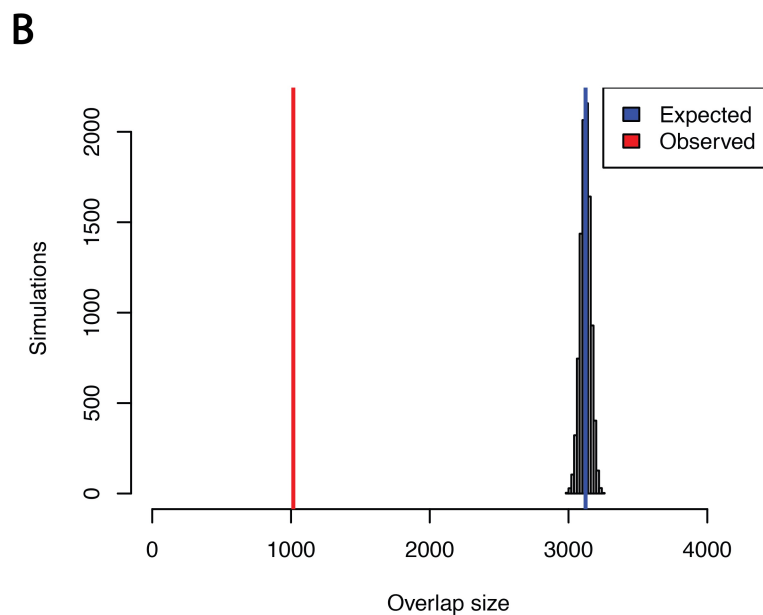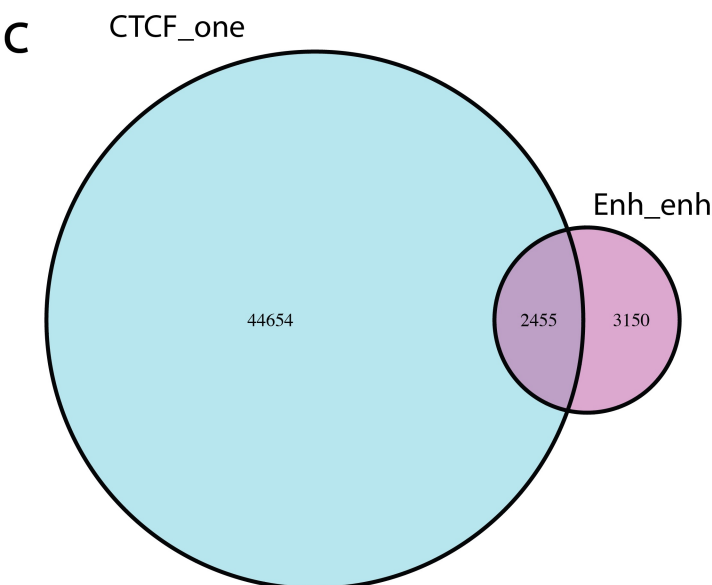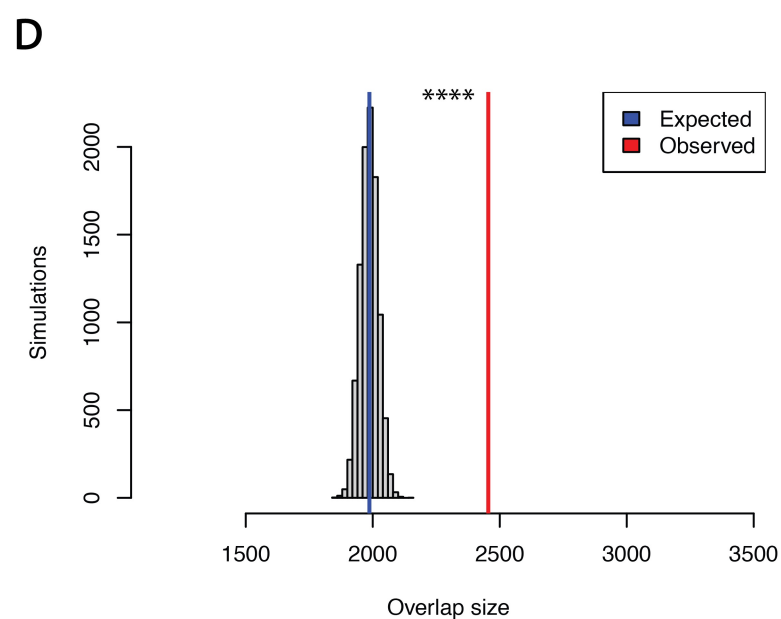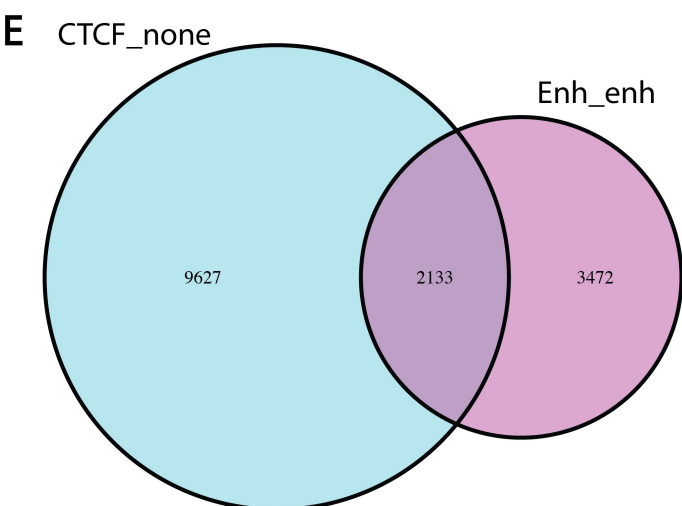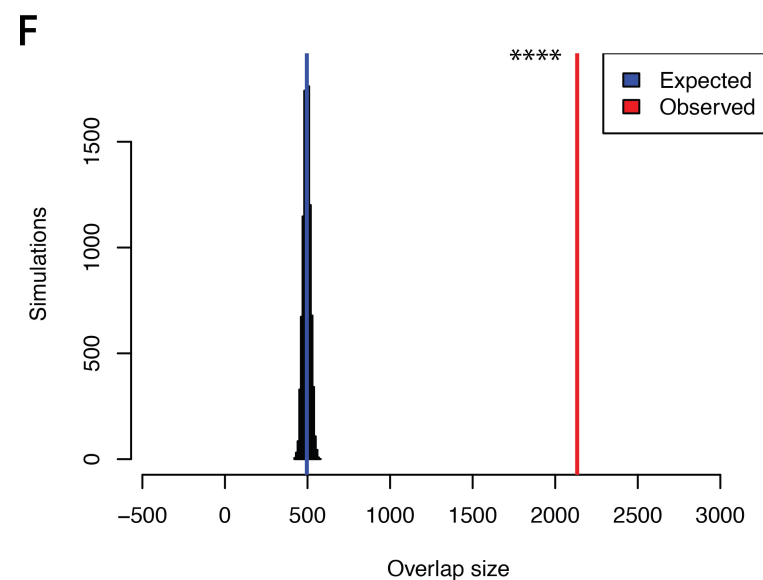

Fig. S13

**BORIS(Zf)/K562-CTCF-ChIP-Seq(GSE32465)/Homer**

Match Rank: 1

Score: 0.91

Offset: -1

Orientation: reverse strand

Alignment:   
-CCACTAGRGGGC-----  
GCCASCAGGGGGCGCYVNNG

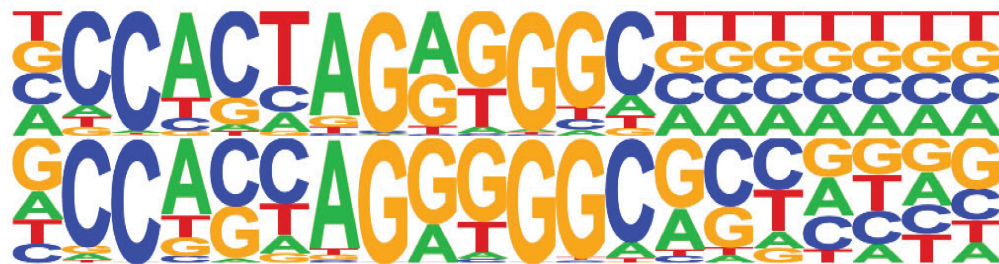

**CTCF/MA0139.1/Jaspar**

Match Rank: 2

Score: 0.90

Offset: -3

Orientation: forward strand

Alignment:   
---CCACTAGRGGGC----  
TGGCCACCAGGGGGCGCTA

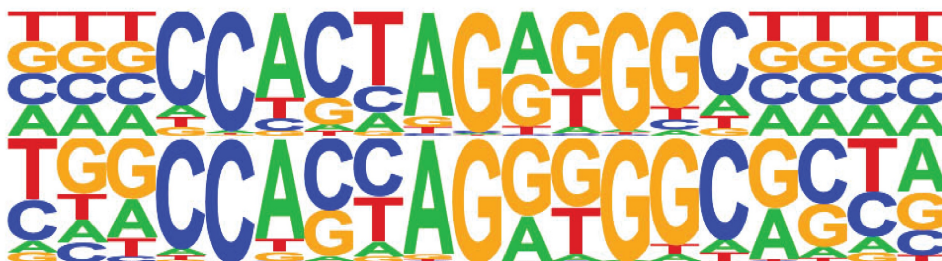

**CTCF(Zf)/CD4+-CTCF-ChIP-Seq(Barski\_et\_al.)/Homer**

Match Rank: 3

Score: 0.90

Offset: -3

Orientation: reverse strand

Alignment:   
---CCACTAGRGGGC----  
TGGCCACCAGGTGGCACTNT

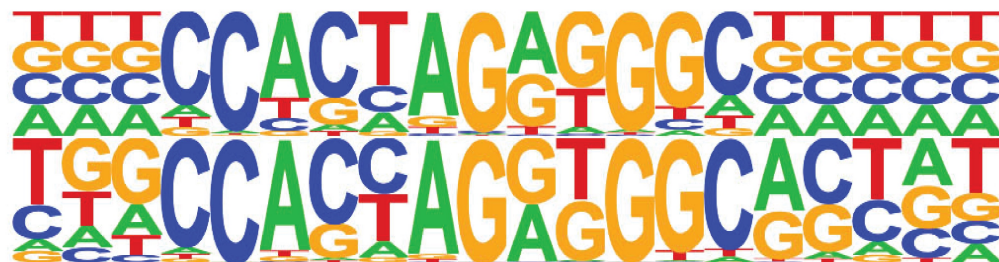

**PB0076.1\_Sp4\_1/Jaspar**

Match Rank: 4

Score: 0.60

Offset: 1

Orientation: reverse strand

Alignment:   
CCACTAGRGGGC-----  
-NNNAAGGGGGCGGGNNN

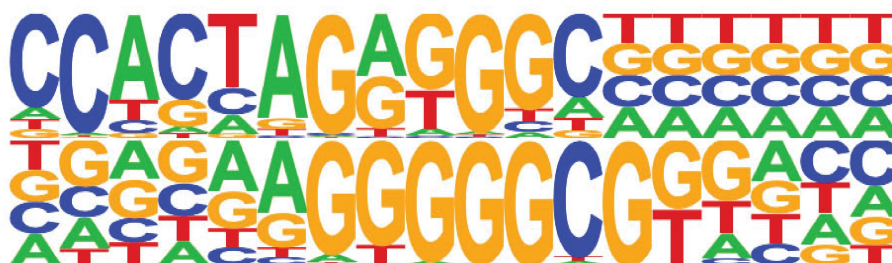

**Fig. S14**

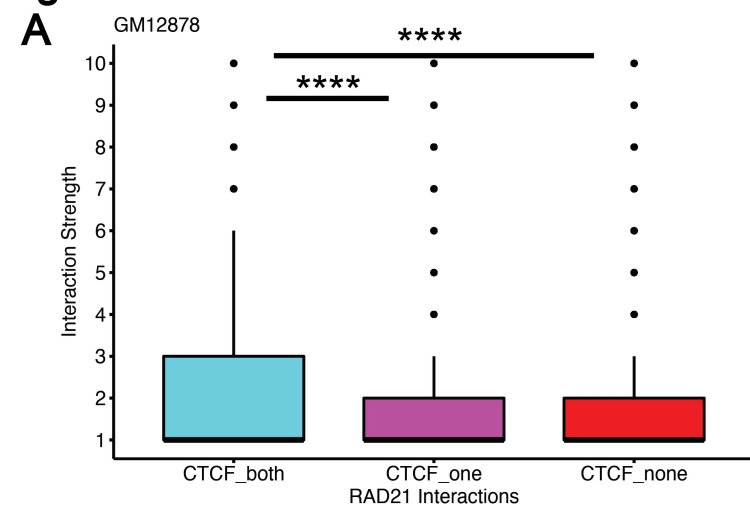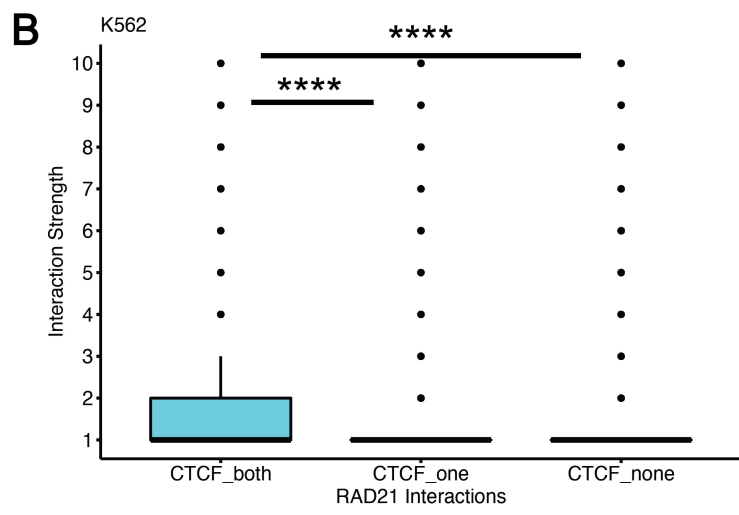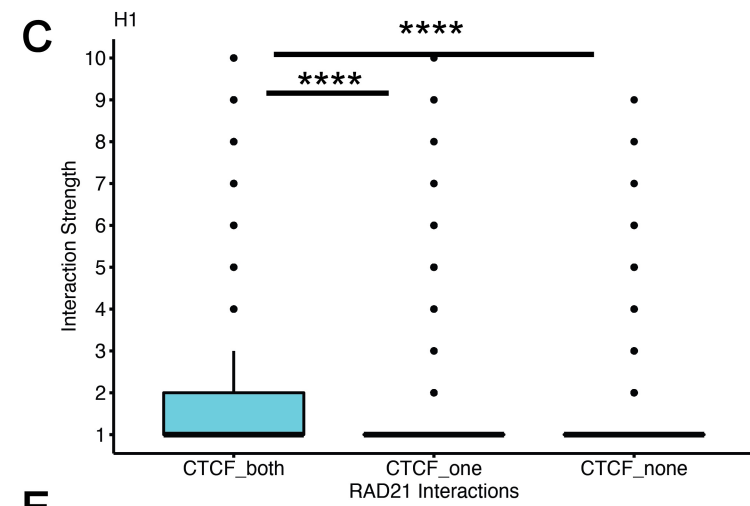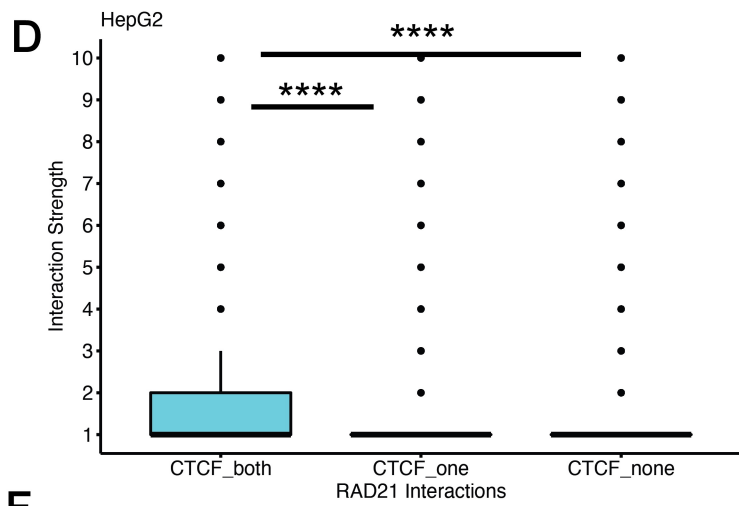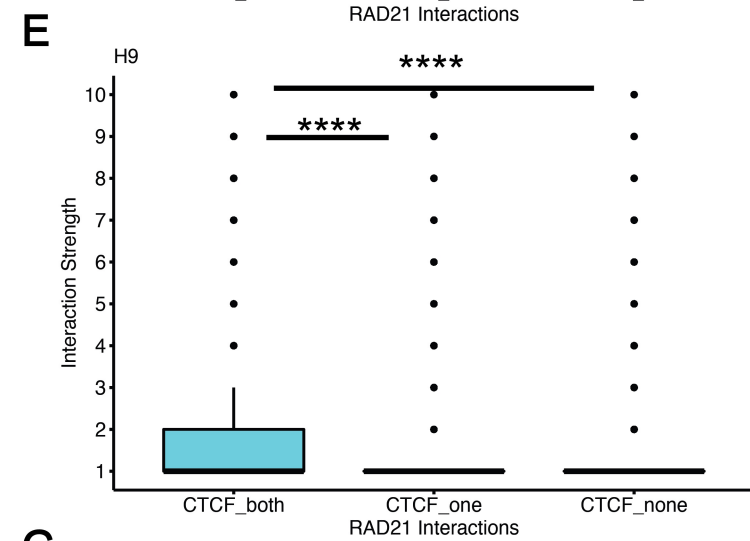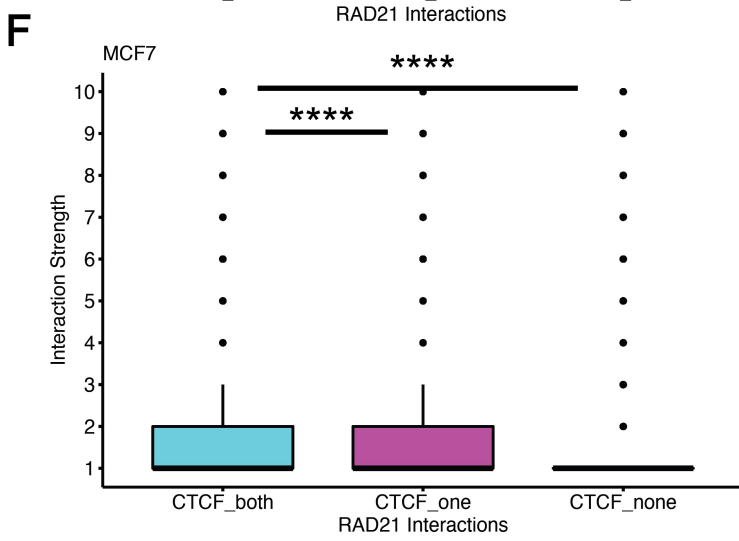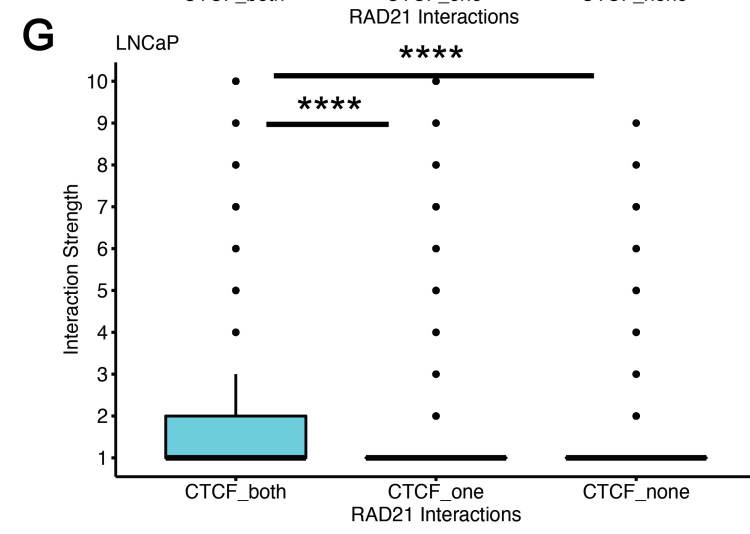

Supplement: 13059_2023_3158_MOESM1_ESM.pdf [file 13059_2023_3158_MOESM1_ESM.pdf]
